# Supplementary material for: Orange and blue luminescence emission to track functionalized porous silicon microparticles inside the cells of the human immune system
Source: Royal Society of Chemistry journal article supplement (doi:10.1039/c4tb01031k), 2014-07-23
Supplement: c4tb01031k1.pdf [file c4tb01031k1.pdf]

## Electronic Supporting Information

### Orange and Blue Luminescence Emission to track Functionalized Porous Silicon Microparticles inside the cells of the Human Immune System

*Nicola Daldosso<sup>a</sup>, Ali Ghafarinazari<sup>a</sup>, Paolo Cortelletti<sup>b</sup>, Laura Marongiu<sup>c</sup>, Marta Donini<sup>c</sup>, Veronica Paterlini<sup>a</sup>, Paolo Bettotti<sup>b</sup>, Romain Guider<sup>b</sup>, Elena Froner<sup>b</sup>, Stefano Dusi<sup>c</sup>, Marina Scarpa<sup>b\*</sup>*

<sup>a</sup> Fluorescence Laboratory, Department of Computer Science, University of Verona, Strada le Grazie 15, 37134 Verona (Italy)

<sup>b</sup> Laboratory of Nanoscience, Department of Physics, University of Trento, Via Sommarive 13, 38123 Trento (Italy)

<sup>c</sup> Division of General Pathology, Department of [Pathology and Diagnostics](#), University of Verona, Strada le Grazie 8, 37134 Verona (Italy)

#### \*CORRESPONDING AUTHOR FOOTNOTE

Marina Scarpa, Laboratory of Nanoscience, Department of Physics, University of Trento,  
Via Sommarive 13, 38123 Trento (Italy)

Phone: +39 0461 282029. Fax: +39 0461 282967

[marina.scarpa@unitn.it](mailto:marina.scarpa@unitn.it)

## List of Contents

The electronic supporting information contains six Figures:

Figure S1. Size distribution of the porous silicon microparticles.

Figure S2. FTIR spectrum of native porous silicon microparticles.

Figure S3. FTIR spectra of porous silicon microparticles after surface derivatization.

Figure S4. Time course of the PL decay of the amine-micro-pSi in aqueous solution.

Figure S5. Decay curves of the PL of the functionalized micro-pSi in ethanol (emission 600 nm).

Figure S6. Decay curve of the PL of the amine-micro-pSi in ethanol (emission 420 nm).

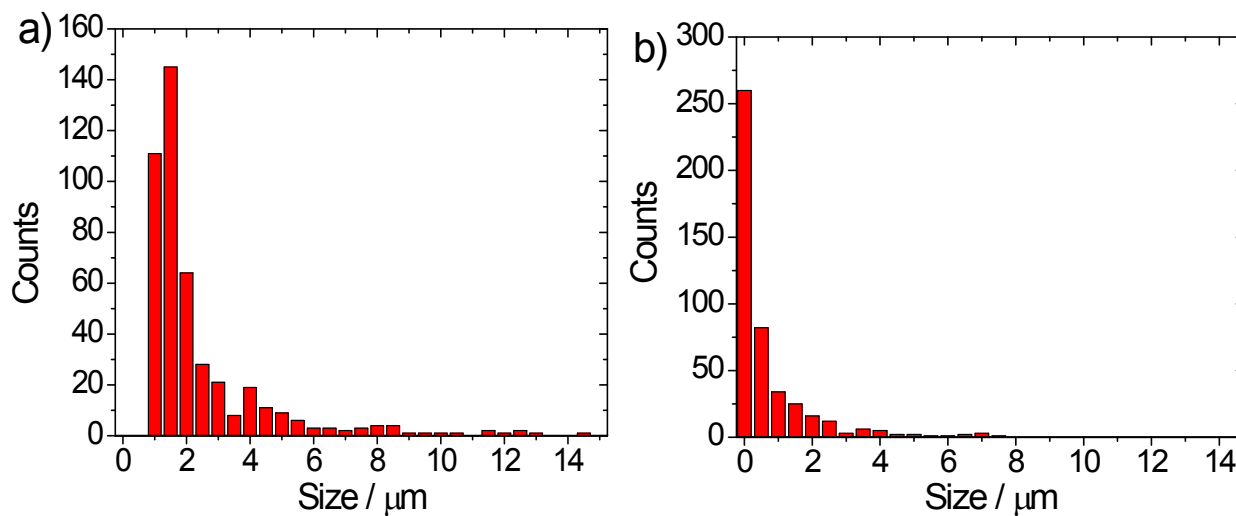

Figure S1. Size distribution of the porous silicon microparticles. (a): major (longitudinal) axis. (b): minor axis.

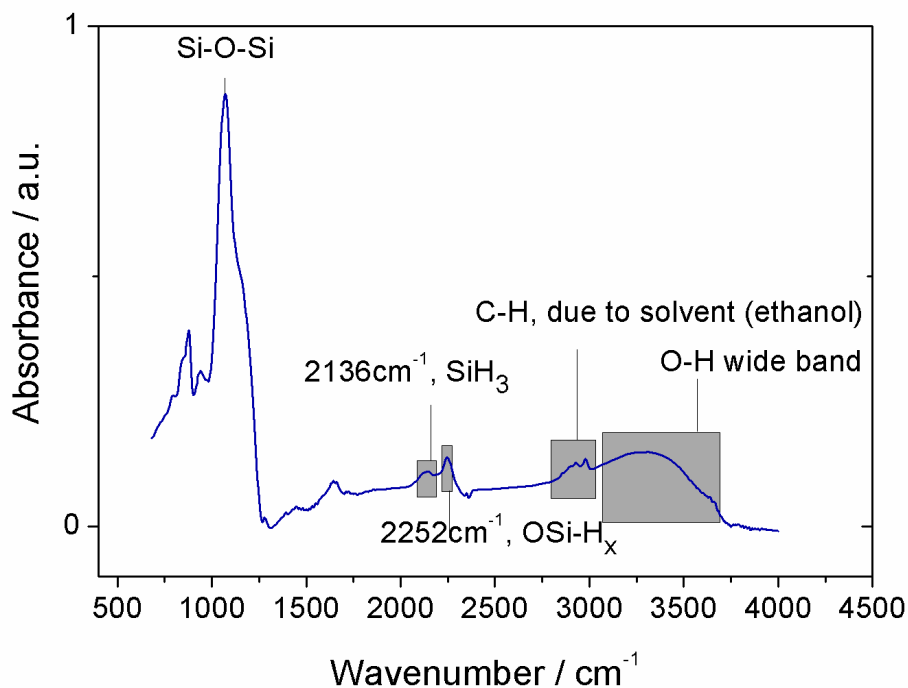

Figure S2. FTIR spectrum of native porous silicon microparticles.

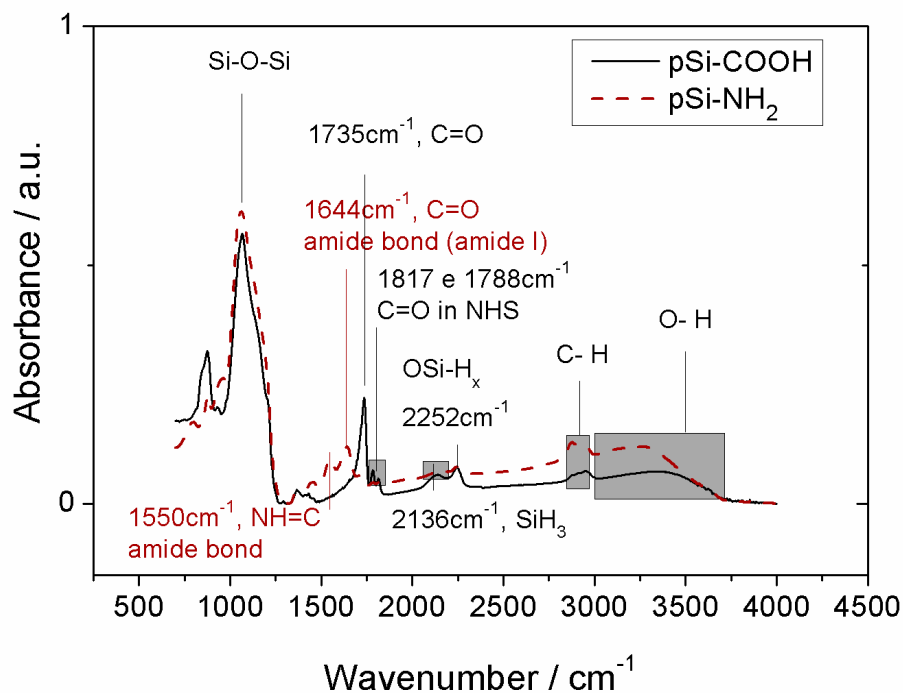

Figure S3. FTIR spectra of porous silicon microparticles after surface derivatization. Micro-pSi after hydrosilylation by acrylic-NHS ester (continuous trace) and micro-pSi after hydrosilylation with acrylic acid followed by coupling with 4, 7, 10-Trioxa-1, 13 tridecanediamine (dashed trace).

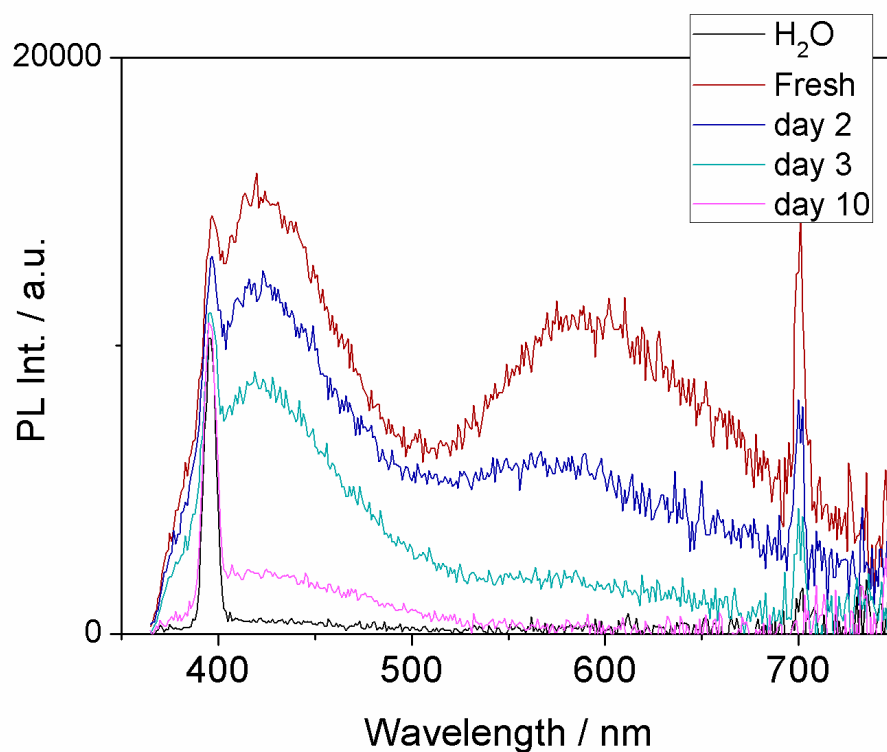

Figure S4. Time course of the PL decay of the amine-micro-pSi in aqueous solution.  $9 \mu\text{g mL}^{-1}$  amino-micro-pSi were suspended in water and the spectra were collected at the reported times after shaking the suspension.

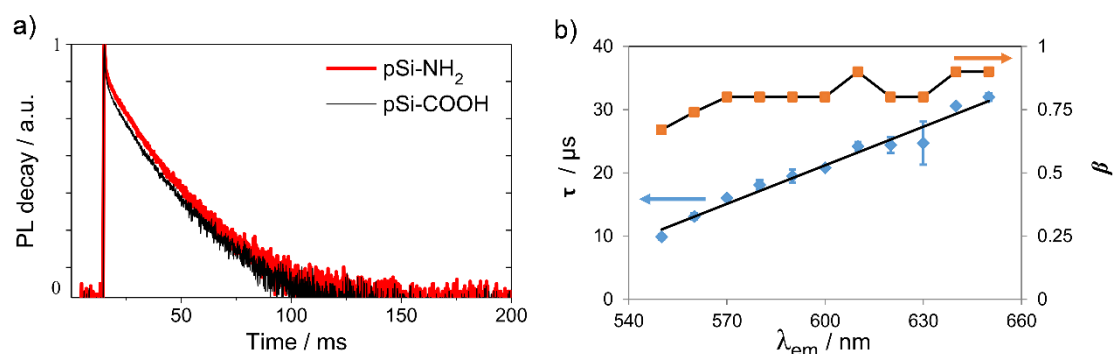

Figure S5. Decay curves of the PL of the functionalized micro-pSi in ethanol. The excitation was set at 350 nm and the emission at 600 nm (a). Lifetimes ( $\tau$ ) and  $\beta$  values versus the emission wavelength obtained by fitting the stretched exponential function to the experimental PL decay of the amino-micro-pSi. Excitation wavelength was 350 nm (b).

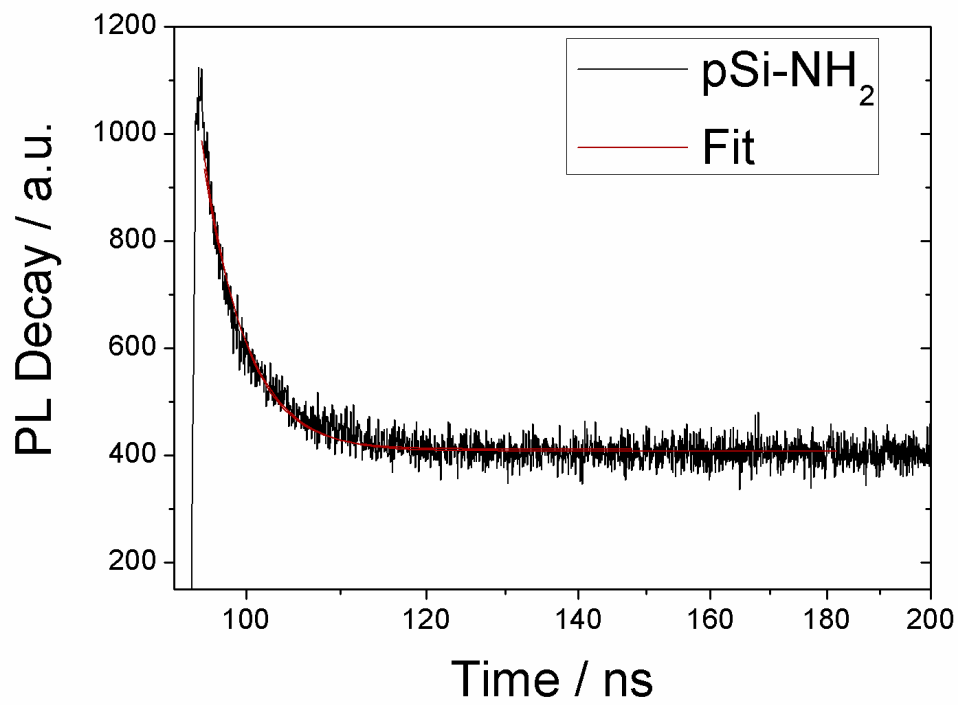

Figure S6. Decay curve of the PL of the amine-micro-pSi. The excitation was set at 375 nm (pulse width 1.2 ns) and the emission was set at 420 nm.
